# Supplementary material
Source: HighWire-hosted journal article supplement (http://thorax.bmjjournals.com/highwire/filestream/174168/field_highwire_adjunct_files/2/Supplemental_Figure_E2.pdf)

# Figure E2

A

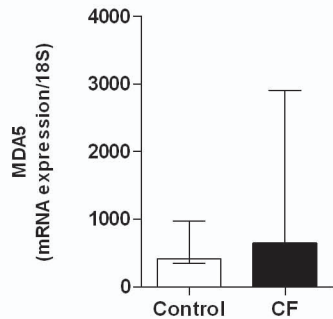

B

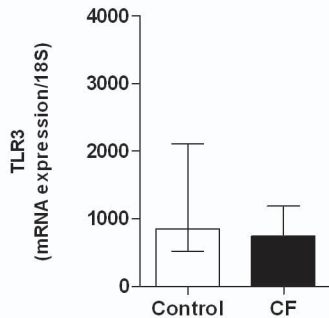

C

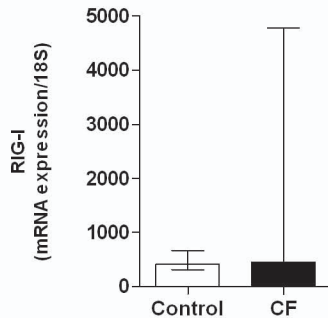

Supplement: Supplemental_Figure_E2.pdf [file Supplemental_Figure_E2.pdf]
